# Supplementary material for: Spatial variability in levels of benzene, formaldehyde, and total benzene, toluene, ethylbenzene and xylenes in New York City: a land-use regression study
Source: PubMed Central journal article supplement (PMC3420325; doi:10.1186/1476-069x-11-51), 2012-07-31
Supplement: 1476-069X-11-51-S1.pdf [file 1476-069X-11-51-S1.pdf]

**Supplemental Table 1 - Details on GIS-based source indicators**

| Source Category    | Data Source                                                                                 | Resolution/positional accuracy                                                                                                                                                          | Links to Sources                                                                                                                                                 |
|--------------------|---------------------------------------------------------------------------------------------|-----------------------------------------------------------------------------------------------------------------------------------------------------------------------------------------|------------------------------------------------------------------------------------------------------------------------------------------------------------------|
| Traffic Indicators | New York Metropolitan Transportation Council (NYMTC) traffic data, 2005                     | Link level data assigned to street centerline data generated by Tele Atlas                                                                                                              | <a href="http://www.nymtc.org/">http://www.nymtc.org/</a>                                                                                                        |
|                    | U.S. Federal Highway Administration Highway Performance Monitoring System (HPMS) data, 2007 | Data linked to National Highway Planning Network line file; accuracy +/- 80m                                                                                                            | <a href="http://www.bts.gov/publications/national_transportation_atlas_database/2011/">www.bts.gov/publications/national_transportation_atlas_database/2011/</a> |
|                    | Accident Location Information System (ALIS) road network data, 2008                         | +/- 40 ft                                                                                                                                                                               | <a href="http://gis.ny.gov/gisdata/inventories/details.cfm?DSID=932">http://gis.ny.gov/gisdata/inventories/details.cfm?DSID=932</a>                              |
|                    | MPSI TrafficMetrix™ data, 1989-2006                                                         | Linked to ALIS road network                                                                                                                                                             | <a href="http://www.mpsisolutions.com">www.mpsisolutions.com</a>                                                                                                 |
|                    | NYC Department of Transportation (DOT) traffic signals, truck and bus routes, 2008          | Truck and bus routes aligned to aerial imagery with +/-2 ft resolution; traffic signals geocoded using NYC Dept of City Planning Geosupport, no statement regarding positional accuracy | <a href="http://a841-dotweb01.nyc.gov/datafeeds/">http://a841-dotweb01.nyc.gov/datafeeds/</a>                                                                    |
| Population Metrics | U.S. Census Bureau 2000 data                                                                | Census block                                                                                                                                                                            | <a href="http://factfinder2.census.gov/faces/nav/jsf/pages/index.xhtml">http://factfinder2.census.gov/faces/nav/jsf/pages/index.xhtml</a>                        |
|                    | Oak Ridge National Laboratory LandScan™ data, 2006                                          | 3 arc second                                                                                                                                                                            | <a href="http://www.ornl.gov/sci/landscan/">http://www.ornl.gov/sci/landscan/</a>                                                                                |
| Built Space        | NYC Department of City Planning Primary Land Use Tax Lot Output (PLUTO™) data, 2007         | 1:250 ft                                                                                                                                                                                | <a href="http://www.nyc.gov/html/dcp/html/bytes/applbyte.shtml">http://www.nyc.gov/html/dcp/html/bytes/applbyte.shtml</a>                                        |

|                           |                                                                             |                                                                                                 |                                                                                                                                                                                                                                                 |
|---------------------------|-----------------------------------------------------------------------------|-------------------------------------------------------------------------------------------------|-------------------------------------------------------------------------------------------------------------------------------------------------------------------------------------------------------------------------------------------------|
| Permitted Emissions       | NYS Department of Environmental Conservation (DEC) permit data, 2005        | No statement regarding positional accuracy                                                      | <a href="http://www.dec.ny.gov/chemical/68524.html">http://www.dec.ny.gov/chemical/68524.html</a>                                                                                                                                               |
|                           | NYC Department of Environmental Protection (DEP) permit data, 2008          | Geocoded using NYC Dept of City Planning Geosupport, no statement regarding positional accuracy | <a href="http://www.nyc.gov/html/dep/html/air/index.shtml">http://www.nyc.gov/html/dep/html/air/index.shtml</a>                                                                                                                                 |
|                           | NYC Department of Buildings (DOB) permit data, 2008                         | Geocoded using NYC Dept of City Planning Geosupport, no statement regarding positional accuracy | <a href="http://www.nyc.gov/html/dob/html/bis/bis.shtml">http://www.nyc.gov/html/dob/html/bis/bis.shtml</a>                                                                                                                                     |
| Transportation Facilities | NYC Department of Citywide Administrative Services, 2008                    | Geocoded using NYC Dept of City Planning Geosupport, no statement regarding positional accuracy | <a href="https://nycopendata.socrata.com/Facilities-and-Structures/IPIS-Integrated-Property-Information-System-/n5mv-nfpy">https://nycopendata.socrata.com/Facilities-and-Structures/IPIS-Integrated-Property-Information-System-/n5mv-nfpy</a> |
|                           | NYC Department of Education, 2008                                           | Geocoded using NYC Dept of City Planning Geosupport, no statement regarding positional accuracy | <a href="http://schools.nyc.gov/default.htm">http://schools.nyc.gov/default.htm</a>                                                                                                                                                             |
| Distributed Facilities    | NYC Department of Sanitation inspections of private waste transfer stations | Geocoded using NYC Dept of City Planning Geosupport, no statement regarding positional accuracy | <a href="http://www.nyc.gov/html/dsny/html/home/home.shtml">http://www.nyc.gov/html/dsny/html/home/home.shtml</a>                                                                                                                               |
|                           | NYC Department of Citywide Administrative Services, 2008                    | Geocoded using NYC Dept of City Planning Geosupport, no statement regarding positional accuracy | <a href="https://nycopendata.socrata.com/Facilities-and-Structures/IPIS-Integrated-Property-Information-System-/n5mv-nfpy">https://nycopendata.socrata.com/Facilities-and-Structures/IPIS-Integrated-Property-Information-System-/n5mv-nfpy</a> |
| Land cover                | USGS impervious surface, 2001                                               | 85 ft resolution                                                                                | <a href="http://seamless.usgs.gov/imperv.php">http://seamless.usgs.gov/imperv.php</a>                                                                                                                                                           |
|                           | NYC Department of Parks EMERGE dataset, 2001                                | 3 ft resolution                                                                                 | <a href="http://www.nycgovparks.org/">http://www.nycgovparks.org/</a>                                                                                                                                                                           |
| Built/natural topography  | NYC DOITT building heights, 2009                                            | +/- 2 ft                                                                                        | <a href="http://www.nyc.gov/html/doitt/html/citywide/gis_downloads.shtml">http://www.nyc.gov/html/doitt/html/citywide/gis_downloads.shtml</a>                                                                                                   |
|                           | NYC DOITT elevation DEM, 2006                                               | 1 ft                                                                                            | <a href="http://www.nyc.gov/html/doitt/html/citywide/gis_downloads.shtml">http://www.nyc.gov/html/doitt/html/citywide/gis_downloads.shtml</a>                                                                                                   |
